# Supplementary material
Source: publisher site journal article supplement (https://www.spandidos-publications.com/4507/downloadSupplementary)

Figure S1. Transfection with miR-620 mimic increases the expression levels of miR-620. RGCs were transfected with Scr mimic, miR-620 mimic or were untreated (Ctrl) for 24 h. Reverse transcription-quantitative PCR was conducted to detect the expression levels of miR-620. The results showed that transfection with miR-620 mimic led to increased levels of miR-620. The significant difference was determined by Student's t-test.  $n=4$ . \* $P<0.05$  vs. Ctrl group. Ctrl, control; miR, microRNA; RGC, retinal ganglion cell; Scr, scrambled.

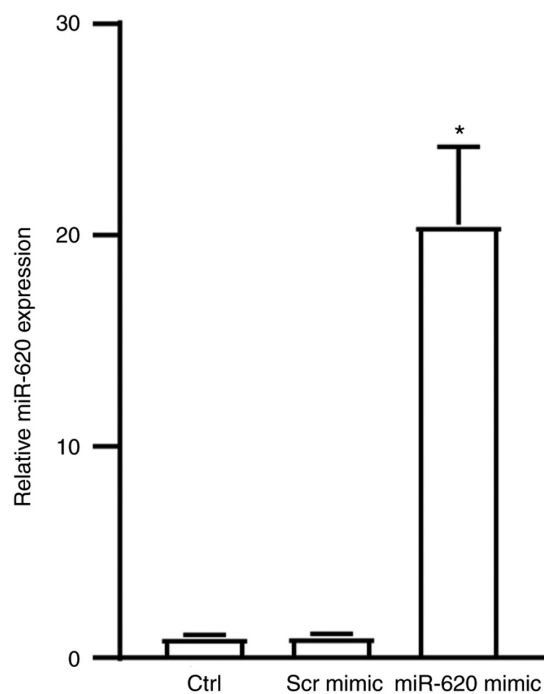

Figure S2. PTEN overexpression leads to increased PTEN protein expression. Retinal ganglion cells were transfected with pcDNA3.1(Vector), pcDNA3.1-PTEN (PTEN) or were untreated (Ctrl) for 24 h. Western blot analysis was conducted to detect the expression levels of PTEN. GAPDH expression was detected as the internal control. The results showed that transfection with pcDNA3.1-PTEN led to increased levels of PTEN. Ctrl, control.

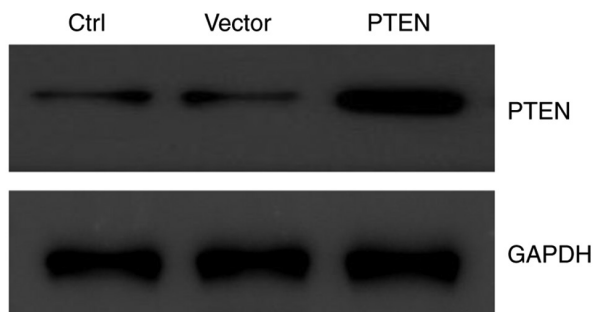

Supplement: Supplementary file 1 [file downloadSupplementary]
